# Supplementary material for: Ants as Bioindicators of Riparian Ecological Health in Catalonian Rivers
Source: MDPI journal article supplement (doi:10.3390/f12050625), 2021-05-14
Supplement: s1 [file s1]

## Supplementary Materials

**Table S1.** Output of K-means clustering analysis of the Upland and Lowland river types based on the environmental variables performed in SPSS.

| Cluster Membership |         |         |          |
|--------------------|---------|---------|----------|
| Case number        | Site Id | Cluster | Distance |
| 1                  | CO1     | 1       | 136.961  |
| 2                  | CO2     | 1       | 105.348  |
| 3                  | CO3     | 1       | 31.619   |
| 4                  | SE1     | 2       | 413.491  |
| 5                  | SE2     | 2       | 417.849  |
| 6                  | SE3     | 2       | 417.123  |
| 7                  | TE1     | 2       | 402.765  |
| 8                  | TE2     | 2       | 415.496  |
| 9                  | TE3     | 2       | 429.534  |

**Table S2.** Data on the Stressor variables for each sampling site surveyed in the study according to different disturbance groups, rivers and river types.

| River type | Disturbance group | River    | Site | Stressor variables            |                                     |           |                                      |                                      |
|------------|-------------------|----------|------|-------------------------------|-------------------------------------|-----------|--------------------------------------|--------------------------------------|
|            |                   |          |      | Riparian                      |                                     | Land use  |                                      |                                      |
|            |                   |          |      | Riparian vegetation cover (%) | Average width of riparian cover (m) | Urban (%) | Cropland and intensive grassland (%) | Shrublands and natural woodlands (%) |
| Upland     | Disturbed         | Ter      | TE1  | 20.18                         | 50.79                               | 9.97      | 55.03                                | 27.48                                |
|            |                   |          | TE2  | 37.80                         | 90.75                               | 1.92      | 12.07                                | 63.61                                |
|            |                   | Segre    | SE1  | 35.92                         | 70.32                               | 5.54      | 60.09                                | 22.81                                |
|            |                   |          | SE2  | 41.09                         | 76.10                               | 0.24      | 25.67                                | 61.88                                |
|            | Less disturbed    | Ter      | TE3  | 57.03                         | 98.77                               | 0         | 2.10                                 | 79.26                                |
|            |                   | Segre    | SE3  | 49.22                         | 161.99                              | 0         | 37.86                                | 56.74                                |
| Lowland    | Disturbed         | Congos t | CO1  | 9.85                          | 39.17                               | 28.68     | 33.17                                | 31.11                                |
|            | Less disturbed    |          | CO2  | 31.38                         | 60.26                               | 28.02     | 16.52                                | 47.04                                |
|            |                   |          | CO3  | 31.83                         | 64.69                               | 10.38     | 42.35                                | 37.49                                |

**Table S3.** Output of K-means clustering analysis of the Disturbed and Less disturbed sites of Upland type based on the pressure variables (stressors) performed in SPSS.

| Cluster Membership |         |         |          |
|--------------------|---------|---------|----------|
| Case number        | Site Id | Cluster | Distance |
| 1                  | SE1     | 1       | 30.561   |
| 2                  | SE2     | 1       | 23.818   |
| 3                  | SE3     | 2       | 38.222   |
| 4                  | TE1     | 1       | 34.903   |
| 5                  | TE2     | 1       | 38.011   |
| 6                  | TE3     | 2       | 38.222   |

**Table S4.** Output of K-means clustering analysis of the Disturbed and Less disturbed sites of Lowland type based on the pressure variables (stressors) performed in SPSS.

| Cluster Membership |         |         |          |
|--------------------|---------|---------|----------|
| Case number        | Site Id | Cluster | Distance |
| 1                  | CO1     | 1       | 0        |
| 2                  | CO2     | 2       | 16.503   |
| 3                  | CO3     | 2       | 16.503   |

**Table S5.** Functional traits used in the study.

| Functional traits              | Definition                                                                      | Ant species                                                                                                                                                                                                                                                                                                                               | References             |
|--------------------------------|---------------------------------------------------------------------------------|-------------------------------------------------------------------------------------------------------------------------------------------------------------------------------------------------------------------------------------------------------------------------------------------------------------------------------------------|------------------------|
| <b>Ecological</b>              |                                                                                 |                                                                                                                                                                                                                                                                                                                                           |                        |
| Arboreal species               | Species that nest in trees and/or are related to vegetation cover               | <i>C. scutellaris</i> , <i>D. quadripunctatus</i> , <i>L. emarginatus</i> , <i>T. nylanderi</i>                                                                                                                                                                                                                                           | [79]                   |
| Open-habitat species           | Species that occur preferably in open habitats                                  | <i>A. senilis</i> , <i>C. cruentatus</i> , <i>C. sylvaticus</i> , <i>F. cunicularia</i> , <i>H. eduardi</i> , <i>L. alienus</i> , <i>L. emarginatus</i> , <i>L. niger</i> , <i>M. barbarus</i> , <i>M. structor</i> , <i>M. schencki</i> , <i>M. specioides</i> , <i>M. spinosior</i> , <i>T. madeirense</i>                              | [69]                   |
| Closed-habitat species         | Species that occur preferably in closed habitats                                | <i>A. subterranea</i> , <i>D. quadripunctatus</i> , <i>M. rubra</i> , <i>T. nylanderi</i>                                                                                                                                                                                                                                                 | [69,80]                |
| Cold climate specialists       | Species specialized in cold climates                                            | <i>D. quadripunctatus</i> , <i>L. alienus</i> , <i>L. emarginatus</i> , <i>L. niger</i>                                                                                                                                                                                                                                                   | [55]                   |
| Hot climate specialists        | Species specialized in hot climates                                             | <i>C. cruentatus</i> , <i>C. sylvaticus</i> , <i>M. barbarus</i> , <i>M. structor</i>                                                                                                                                                                                                                                                     | [55]                   |
| Cryptics                       | Species with specific niche requirements and cryptic habitats                   | <i>A. subterranea</i> , <i>T. nylanderi</i>                                                                                                                                                                                                                                                                                               | [55]                   |
| <b>Life-history</b>            |                                                                                 |                                                                                                                                                                                                                                                                                                                                           |                        |
| <i>Diet</i>                    |                                                                                 |                                                                                                                                                                                                                                                                                                                                           |                        |
| Seed harvesters                | Species that collect seeds as part of their diet                                | <i>A. senilis</i> , <i>M. barbarus</i> , <i>M. structor</i>                                                                                                                                                                                                                                                                               | [67-68, 79,81-82]      |
| Sugar feeders                  | Species that feed on sugary exudates, such as honeydew                          | <i>C. cruentatus</i> , <i>C. sylvaticus</i> , <i>C. scutellaris</i> , <i>D. quadripunctatus</i> , <i>F. cunicularia</i> , <i>L. alienus</i> , <i>L. emarginatus</i> , <i>L. niger</i> , <i>M. rubra</i> , <i>M. schencki</i> , <i>M. specioides</i> , <i>P. pygmaea</i> , <i>T. madeirense</i> , <i>T. nylanderi</i>                      | [67-68, 79,81-82]      |
| Opportunists                   | Species that take advantage of a wide range of resources                        | <i>A. senilis</i> , <i>F. cunicularia</i> , <i>T. madeirense</i> , <i>T. caespitum</i>                                                                                                                                                                                                                                                    | [55,83]                |
| Generalists                    | Species that feed on everything from plant material, sugars and dead arthropods | <i>C. scutellaris</i> , <i>M. rubra</i> , <i>M. schencki</i> , <i>M. specioides</i> , <i>M. spinosior</i> , <i>P. pallidula</i> , <i>P. pygmaea</i>                                                                                                                                                                                       | [55]                   |
| Specialist predators           | Species specialized in preying on arthropods                                    | <i>H. eduardi</i>                                                                                                                                                                                                                                                                                                                         | [55]                   |
| <i>Behavioral</i>              |                                                                                 |                                                                                                                                                                                                                                                                                                                                           |                        |
| Dominants                      | Species that are at the top of dominance hierarchies                            | <i>C. cruentatus</i> , <i>C. sylvaticus</i> , <i>C. scutellaris</i> , <i>L. alienus</i> , <i>L. emarginatus</i> , <i>L. niger</i> , <i>M. barbarus</i> , <i>M. rubra</i> , <i>M. specioides</i> , <i>M. spinosior</i> , <i>P. pallidula</i> , <i>T. madeirense</i> , <i>T. caespitum</i>                                                  | [67,78, 84-85]         |
| Diurnal species                | Species with diurnal foraging habits                                            | <i>A. senilis</i> , <i>A. subterranea</i> , <i>C. scutellaris</i> , <i>D. quadripunctatus</i> , <i>F. cunicularia</i> , <i>L. alienus</i> , <i>M. barbarus</i> , <i>M. structor</i> , <i>M. rubra</i> , <i>M. specioides</i> , <i>M. spinosior</i> , <i>P. pygmaea</i> , <i>T. madeirense</i> , <i>T. nylanderi</i> , <i>T. caespitum</i> | [79,84,86-87]          |
| Nocturnal/ crepuscular species | Species with nocturnal or crepuscular foraging habits                           | <i>C. cruentatus</i> , <i>C. sylvaticus</i> , <i>L. emarginatus</i> , <i>L. niger</i> , <i>M. schencki</i> , <i>P. pallidula</i>                                                                                                                                                                                                          | [67-68,79,81,84,86-89] |
| <i>Morphological</i>           |                                                                                 |                                                                                                                                                                                                                                                                                                                                           |                        |

|             |                                                               |                                                                                                                                                                                                                                                |      |
|-------------|---------------------------------------------------------------|------------------------------------------------------------------------------------------------------------------------------------------------------------------------------------------------------------------------------------------------|------|
| Larger ants | Species that measure in average more than 4 mm of body length | <i>A. senilis</i> , <i>A. subterranea</i> , <i>C. cruentatus</i> , <i>C. scutellaris</i> , <i>F. cunicularia</i> , <i>M. barbarus</i> , <i>M. structor</i> , <i>M. rubra</i> , <i>M. schencki</i> , <i>M. specioides</i> , <i>M. spinosior</i> | [69] |
|-------------|---------------------------------------------------------------|------------------------------------------------------------------------------------------------------------------------------------------------------------------------------------------------------------------------------------------------|------|

**Table S6.** Ant potential metrics tested in the present work.

| Ant candidate metrics                                 | Calculation (units)                                                                                              |
|-------------------------------------------------------|------------------------------------------------------------------------------------------------------------------|
| Ant foraging activity                                 | Number of worker individuals (no.)                                                                               |
| Observed species richness                             | Number of observed ant species (no.)                                                                             |
| Dominants                                             | [Number of dominant species/ Observed species richness] x 100 (%)                                                |
| Seed harvesters                                       | [Number of dominant species/ Observed species richness] x 100 (%)                                                |
| Sugar feeders                                         | [Number of seed harvesters species/ Observed species richness] x 100 (%)                                         |
| Arboreal species                                      | [Number of arboreal species/ Observed species richness] x 100 (%)                                                |
| Open-habitat species                                  | [Number of open-habitat species/ Observed species richness] x 100 (%)                                            |
| Closed-habitat species                                | [Number of closed-habitat species/ Observed species richness] x 100 (%)                                          |
| Larger ants                                           | [Number of ant species larger than 4 mm in average of body length/ Observed species richness] x 100 (%)          |
| Diurnal species                                       | [Number of diurnal species/ Observed species richness] x 100 (%)                                                 |
| Nocturnal/ crepuscular species                        | [Number of nocturnal or crepuscular species/ Observed species richness] x 100 (%)                                |
| Specialist predators (SP)                             | [Number of specialist predator species/ Observed species richness] x 100 (%)                                     |
| Cold climate specialist (CCS)                         | [Number of cold climate specialist species/ Observed species richness] x 100 (%)                                 |
| Hot climate specialist (HCS)                          | [Number of hot climate specialist species/ Observed species richness] x 100 (%)                                  |
| Cryptics (C)                                          | [Number of cryptic species/ Observed species richness] x 100 (%)                                                 |
| Opportunists (O)                                      | [Number of opportunist species/ Observed species richness] x 100 (%)                                             |
| Generalists (G)                                       | [Number of generalist species/ Observed species richness] x 100 (%)                                              |
| Specialist predators + Cryptics                       | [Number of specialist predator and cryptic species/ Observed species richness] x 100 (%)                         |
| Opportunists + Generalists                            | [Number of opportunist and generalist species/ Observed species richness] x 100 (%)                              |
| Functional richness                                   | [Number of functional groups (SP, CCS, HCS, C, O, G)/ Total functional groups (SP, CCS, HCS, C, O, G)] x 100 (%) |
| <i>Aphaenogaster senilis</i> foraging activity        | Number of <i>A. senilis</i> worker individuals recorded/ total number of worker individuals (no.)                |
| <i>Aphaenogaster subterranea</i> foraging activity    | Number of <i>A. subterranea</i> worker individuals recorded/ total number of worker individuals (no.)            |
| <i>Camponotus cruentatus</i> foraging activity        | Number of <i>C. cruentatus</i> worker individuals recorded/ total number of worker individuals (no.)             |
| <i>Camponotus sylvaticus</i> foraging activity        | Number of <i>C. sylvaticus</i> worker individuals recorded/ total number of worker individuals (no.)             |
| <i>Crematogaster scutellaris</i> foraging activity    | Number of <i>C. scutellaris</i> worker individuals recorded/ total number of worker individuals (no.)            |
| <i>Dolichoderus quadripunctatus</i> foraging activity | Number of <i>D. quadripunctatus</i> worker individuals recorded/ total number of worker individuals (no.)        |
| <i>Formica cunicularia</i> foraging activity          | Number of <i>F. cunicularia</i> worker individuals recorded/ total number of worker individuals (no.)            |
| <i>Hypoponera eduardi</i> foraging activity           | Number of <i>H. eduardi</i> worker individuals recorded/ total number of worker individuals (no.)                |
| <i>Lasius alienus</i> foraging activity               | Number of <i>L. alienus</i> worker individuals recorded/ total number of worker individuals (no.)                |
| <i>Lasius emarginatus</i> foraging activity           | Number of <i>L. emarginatus</i> worker individuals recorded/ total number of worker individuals (no.)            |
| <i>Lasius niger</i> foraging activity                 | Number of <i>L. niger</i> worker individuals recorded/ total number of worker individuals (no.)                  |
| <i>Messor barbarus</i> foraging activity              | Number of <i>M. barbarus</i> worker individuals recorded/ total number of worker individuals (no.)               |
| <i>Messor structor</i> foraging activity              | Number of <i>M. structor</i> worker individuals recorded/ total number of worker individuals (no.)               |
| <i>Myrmica rubra</i> foraging activity                | Number of <i>M. rubra</i> worker individuals recorded/ total number of worker individuals (no.)                  |
| <i>Myrmica schencki</i> foraging activity             | Number of <i>M. schencki</i> worker individuals recorded/ total number of worker individuals (no.)               |
| <i>Myrmica specioides</i> foraging activity           | Number of <i>M. specioides</i> worker individuals recorded/ total number of worker individuals (no.)             |
| <i>Myrmica spinosior</i> foraging activity            | Number of <i>M. spinosior</i> worker individuals recorded/ total number of worker individuals (no.)              |
| <i>Pheidole pallidula</i> foraging activity           | Number of <i>P. pallidula</i> worker individuals recorded/ total number of worker individuals (no.)              |
| <i>Plagiolepis pygmaea</i> foraging activity          | Number of <i>P. pygmaea</i> worker individuals recorded/ total number of worker individuals (no.)                |
| <i>Tapinoma madeirense</i> foraging activity          | Number of <i>T. madeirense</i> worker individuals recorded/ total number of worker individuals (no.)             |
| <i>Temnothorax nylanderii</i> foraging activity       | Number of <i>T. nylanderii</i> worker individuals recorded/ total number of worker individuals (no.)             |
| <i>Tetramorium caespitum</i> foraging activity        | Number of <i>T. caespitum</i> worker individuals recorded/ total number of worker individuals (no.)              |

**Table S7.** Ant species recorded at the Catalan river basins, with additional information on the overall frequency of occurrence (percentage of pitfalls at a site where a species was detected). The number of sites surveyed are shown.

| Subfamily                           | Frequency of occurrence (%) |                      |                 |                      |
|-------------------------------------|-----------------------------|----------------------|-----------------|----------------------|
|                                     | Upland type                 |                      | Lowland type    |                      |
|                                     | (N=6)                       |                      | (N=3)           |                      |
| Ant species                         | Disturbed (N=4)             | Less disturbed (N=2) | Disturbed (N=1) | Less disturbed (N=2) |
| <b>Dolichoderinae</b>               |                             |                      |                 |                      |
| <i>Dolichoderus quadripunctatus</i> | 3                           |                      |                 |                      |
| <i>Tapinoma madeirense</i>          | 3                           |                      |                 | 6                    |
| <b>Formicinae</b>                   |                             |                      |                 |                      |
| <i>Camponotus cruentatus</i>        |                             |                      |                 | 6                    |
| <i>Camponotus sylvaticus</i>        |                             |                      | 11              |                      |
| <i>Formica cunicularia</i>          | 14                          |                      |                 |                      |

|                                  |    |    |     |    |
|----------------------------------|----|----|-----|----|
| <i>Lasius alienus</i>            | 6  |    |     |    |
| <i>Lasius emarginatus</i>        |    |    |     | 11 |
| <i>Lasius niger</i>              | 25 | 39 |     | 17 |
| <i>Plagiolepis pygmaea</i>       |    |    | 22  | 11 |
| <b>Myrmicinae</b>                |    |    |     |    |
| <i>Aphaenogaster senilis</i>     |    |    | 100 | 39 |
| <i>Aphaenogaster subterranea</i> |    |    |     | 11 |
| <i>Crematogaster scutellaris</i> |    |    |     |    |
| <i>Messor barbarus</i>           |    |    | 22  |    |
| <i>Messor structor</i>           |    |    |     | 17 |
| <i>Myrmica rubra</i>             | 39 | 94 |     | 6  |
| <i>Myrmica shencki</i>           | 3  |    |     |    |
| <i>Myrmica speciosoides</i>      | 6  |    |     |    |
| <i>Myrmica spinosior</i>         | 6  |    |     |    |
| <i>Pheidole pallidula</i>        |    |    |     | 33 |
| <i>Temnothorax nylanderi</i>     |    | 28 |     |    |
| <i>Tetramorium caespitum</i>     | 22 |    | 11  | 22 |
| <b>Ponerinae</b>                 |    |    |     |    |
| <i>Hypoponera eduardi</i>        |    | 6  |     | 6  |

---
